# Supplementary material for: High-performance III–VI monolayer transistors for flexible devices
Source: Royal Society of Chemistry journal article supplement (doi:10.1039/d0cp00578a), 2020-01-01
Supplement: d0cp00578a1.pdf [file d0cp00578a1.pdf]

Supporting Information for

High-performance III-VI monolayer transistors for flexible devices

Jianhui Chen<sup>1</sup>, Shuchang Cai<sup>1</sup>, Rui Xiong<sup>1</sup>, Baisheng Sa<sup>1,\*</sup>, Cuilian Wen<sup>1</sup>, Bo Wu<sup>1</sup> and Zhimei

Sun<sup>2,\*\*</sup>

<sup>1</sup>*Key Laboratory of Eco-materials Advanced Technology, College of Materials Science and Engineering, Fuzhou University, Fuzhou 350108, P. R. China*

<sup>2</sup>*School of Materials Science and Engineering, and Center for Integrated Computational Materials Science, International Research Institute for Multidisciplinary Science, Beihang University, Beijing 100191, P. R. China*

\*To whom the correspondence should be addressed: [bssa@fzu.edu.cn](mailto:bssa@fzu.edu.cn).

\*\*To whom the correspondence should be addressed: [zmsun@buaa.edu.cn](mailto:zmsun@buaa.edu.cn).

Table S1. Benchmark of transfer characteristics of DG InSe monolayer MOSFET at different length of  $L_g$  and different electron doping level

| $L_g$ (nm) | $N_e$ (cm <sup>-3</sup> ) | $SS_{\min}$ (mV/dec) | $I_{\text{on}}$ ( $\mu\text{A}/\mu\text{m}$ ) | $I_{\text{on}}/I_{\text{off}}$ |
|------------|---------------------------|----------------------|-----------------------------------------------|--------------------------------|
| 3nm        | $10^{20}$                 | 540                  | -                                             | -                              |
|            | $5 \times 10^{20}$        | 936                  | -                                             | -                              |
|            | $10^{21}$                 | 1199                 | -                                             | -                              |
| 5nm        | $10^{20}$                 | 195                  | 283                                           | $2.83 \times 10^3$             |
|            | $5 \times 10^{20}$        | 256                  | 0.75                                          | 7.5                            |
|            | $10^{21}$                 | 318                  | -                                             | -                              |
| 7nm        | $10^{20}$                 | 104                  | 1641                                          | $1.64 \times 10^4$             |
|            | $5 \times 10^{20}$        | 121                  | 2318                                          | $2.32 \times 10^4$             |
|            | $10^{21}$                 | 153                  | 327                                           | $3.27 \times 10^3$             |
| 9nm        | $10^{20}$                 | 86                   | 1591                                          | $1.59 \times 10^4$             |
|            | $5 \times 10^{20}$        | 88                   | 4093                                          | $4.09 \times 10^4$             |
|            | $10^{21}$                 | 165                  | 3836                                          | $3.87 \times 10^4$             |

Table S2. The  $I_{\text{on}}$  and  $SS_{\text{min}}$  of DG InSe monolayer MOSFET with different length of  $L_g$  and UL structure

| $L_g$ (nm) | $L_{\text{UL}}$ (nm) | $I_{\text{on}}$ ( $\mu\text{A}/\mu\text{m}$ ) | $SS_{\text{min}}$ (mV/dec) |
|------------|----------------------|-----------------------------------------------|----------------------------|
|            | 0                    | -                                             | 936                        |
| 3          | 1                    | -                                             | 243                        |
|            | 2                    | 86.58                                         | 187                        |
|            | 3                    | 1016.13                                       | 157                        |
|            | 0                    | -                                             | 246                        |
| 5          | 1                    | 1675.72                                       | 157                        |
|            | 2                    | 3059.28                                       | 117                        |
|            | 3                    | 2497.19                                       | 95                         |
|            | 0                    | 2200.19                                       | 139                        |
| 7          | 1                    | 3996.17                                       | 102                        |
|            | 2                    | 4662.79                                       | 83                         |
|            | 3                    | 2578.72                                       | 72                         |
|            | 0                    | 4093.18                                       | 88                         |
| 9          | 1                    | 5682.29                                       | 77                         |
|            | 2                    | 5124.35                                       | 63                         |
|            | 3                    | 2606.26                                       | 45                         |

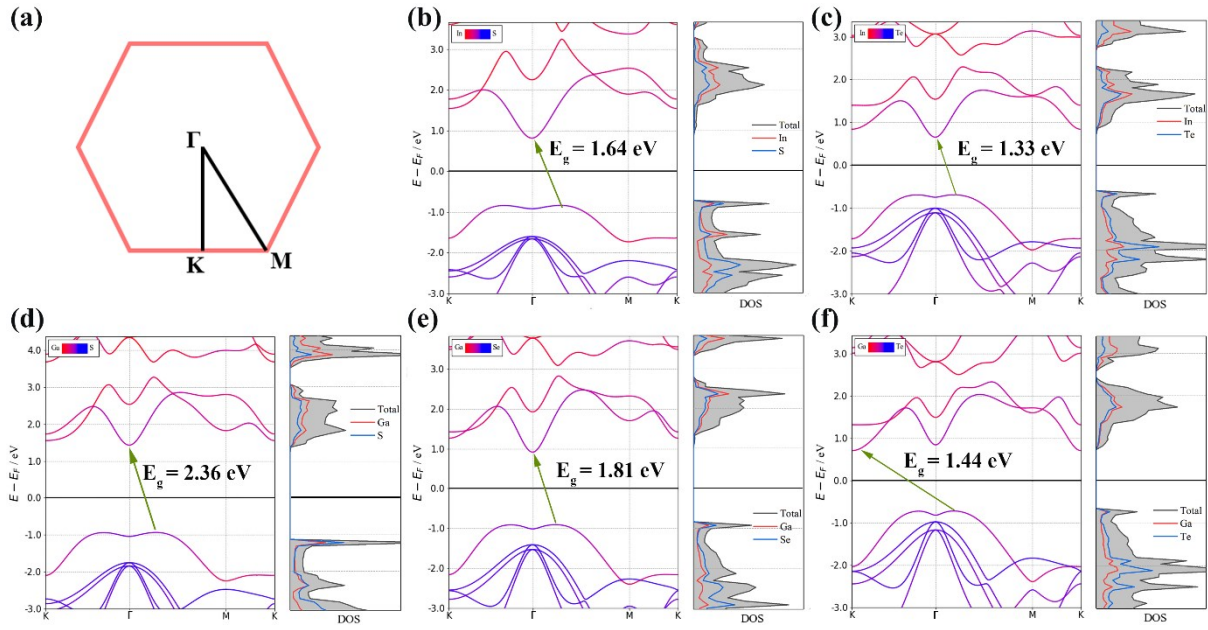

Fig. S1. (a) First Brillouin zone with labeled high-symmetry points of MX monolayers. The projected band structure and partial density of states of (b) InS, (c) InTe, (d) GaS, (e) GaSe, and (f) GaTe monolayers, respectively.

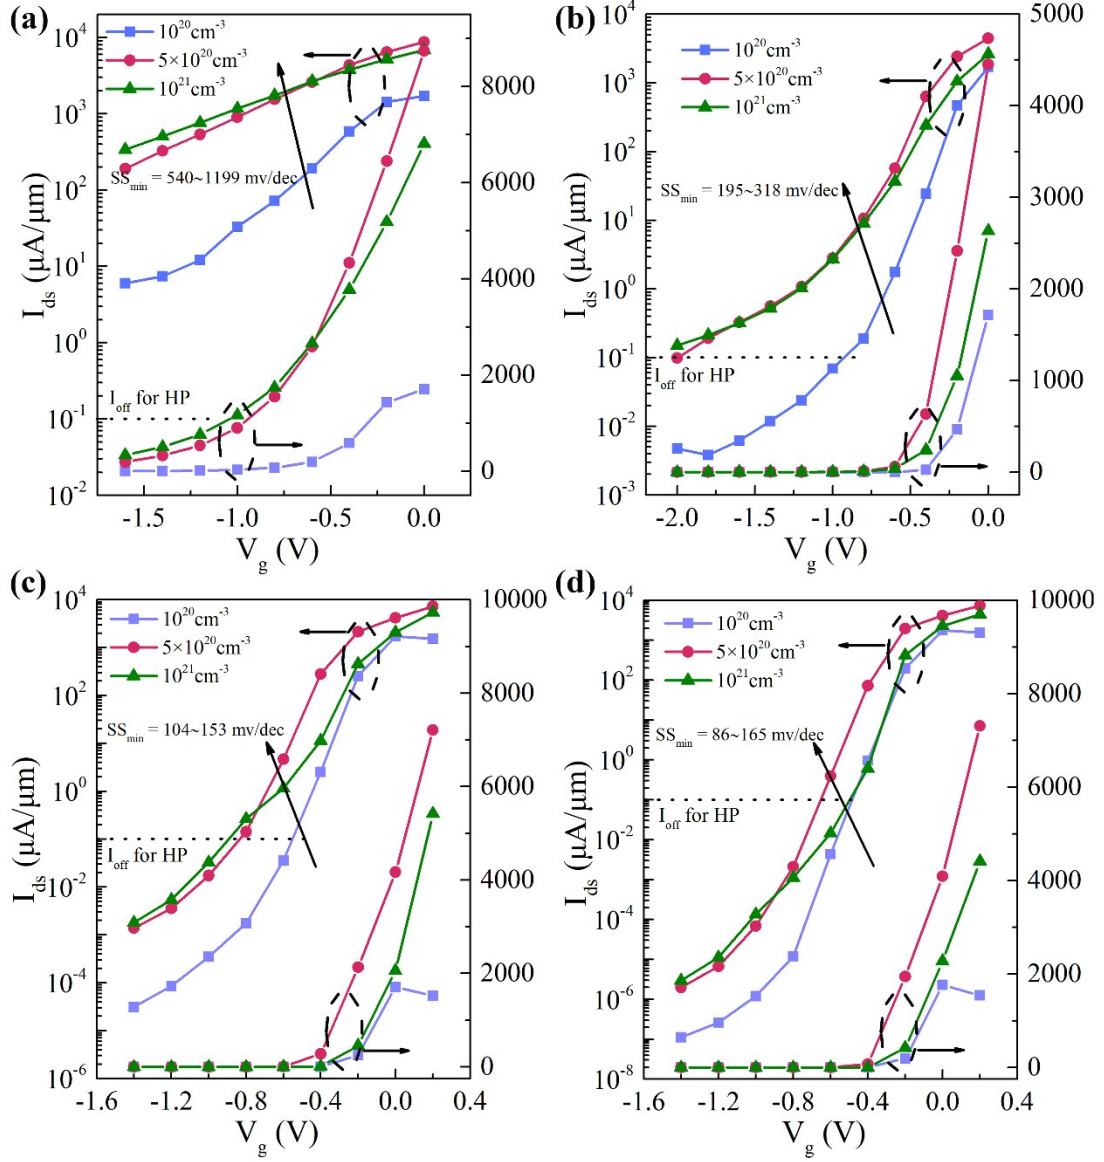

Fig. S2. The doping dependent test of InSe monolayer MOSFETs transfer characteristics at  $N_e = 10^{20}$ ,  $5 \times 10^{20}$ , and  $10^{21}$  e/cm<sup>3</sup> for  $L_g =$  (a) 3, (b) 5, (c) 7, and (d) 9 nm without UL structure, respectively.
